# Supplementary material for: Detection of Rare Antimicrobial Resistance Profiles by Active and Passive Surveillance Approaches
Source: PubMed Central journal article supplement (PMC4938605; doi:10.1371/journal.pone.0158515), 2016-07-08
Supplement: pone.0158515.s001.pdf [file pone.0158515.s001.pdf]

| Profile | active/healthy | % active/healthy isolates | passive/clinical | % passive/clinical isolates | phenotype      |
|---------|----------------|---------------------------|------------------|-----------------------------|----------------|
| 1       | 77             | 33.92                     | 85               | 36.02                       | ApClStSxTe     |
| 2       | 2              | 0.88                      | 5                | 2.12                        | ApClSxTe       |
| 3       | 2              | 0.88                      | 3                | 1.27                        | SxTe           |
| 4       | 27             | 11.89                     | 35               | 14.83                       | ApClKaStSxTe   |
| 5       | 4              | 1.76                      | 2                | 0.85                        | KaStSx         |
| 6       | 3              | 1.32                      | 0                | 0.00                        | Ka             |
| 7       | 3              | 1.32                      | 2                | 0.85                        | StSxTe         |
| 8       | 2              | 0.88                      | 0                | 0.00                        | ApKaStTe       |
| 9       | 2              | 0.88                      | 1                | 0.42                        | ApClGmStSxTe   |
| 10      | 1              | 0.44                      | 0                | 0.00                        | ClStSxTe       |
| 11      | 5              | 2.20                      | 2                | 0.85                        | StSx           |
| 12      | 10             | 4.41                      | 16               | 6.78                        | ApKaStSxTe     |
| 13      | 24             | 10.57                     | 21               | 8.90                        | Pansusceptible |
| 14      | 3              | 1.32                      | 2                | 0.85                        | ApKaSxTe       |
| 15      | 1              | 0.44                      | 1                | 0.42                        | SxTeSxt        |
| 16      | 1              | 0.44                      | 0                | 0.00                        | ApTeSxt        |
| 17      | 3              | 1.32                      | 2                | 0.85                        | ApClStSxTeSxt  |
| 18      | 1              | 0.44                      | 2                | 0.85                        | ApKaStSxTeSxt  |
| 19      | 3              | 1.32                      | 2                | 0.85                        | KaTe           |
| 20      | 23             | 10.13                     | 7                | 2.97                        | Te             |
| 21      | 1              | 0.44                      | 2                | 0.85                        | ApStTe         |
| 22      | 4              | 1.76                      | 5                | 2.12                        | Ap             |
| 23      | 0              | 0.00                      | 1                | 0.42                        | GmSxTe         |
| 24      | 0              | 0.00                      | 2                | 0.85                        | Sx             |
| 25      | 0              | 0.00                      | 1                | 0.42                        | SxSxt          |
| 26      | 0              | 0.00                      | 2                | 0.85                        | GmSxTeSxt      |
| 27      | 0              | 0.00                      | 1                | 0.42                        | ApGmKaStSxTe   |
| 28      | 0              | 0.00                      | 2                | 0.85                        | AmcApClSxTe    |

|    |   |      |   |                        |
|----|---|------|---|------------------------|
| 29 | 1 | 0.44 | 2 | 0.85 ApSxTeSxt         |
| 30 | 2 | 0.88 | 2 | 0.85 ApClKaStSxTeSxt   |
| 31 | 0 | 0.00 | 1 | 0.42 AmcApCnClStSxTe   |
| 32 | 2 | 0.88 | 3 | 1.27 ApStSxTeSxt       |
| 33 | 0 | 0.00 | 2 | 0.85 KaSxTeSxt         |
| 34 | 1 | 0.44 | 4 | 1.69 ApStSxTe          |
| 35 | 1 | 0.44 | 1 | 0.42 AmcApClKaStSxTe   |
| 36 | 3 | 1.32 | 1 | 0.42 AmcApClStSxTe     |
| 37 | 0 | 0.00 | 5 | 2.12 KaStSxTeSxt       |
| 38 | 0 | 0.00 | 1 | 0.42 ApClKaSxTeSxt     |
| 39 | 0 | 0.00 | 1 | 0.42 ApKaTe            |
| 40 | 0 | 0.00 | 2 | 0.85 ApGmKaStSxTeSxt   |
| 41 | 0 | 0.00 | 1 | 0.42 ApGmSxTeSxt       |
| 42 | 0 | 0.00 | 2 | 0.85 StSxTeSxt         |
| 43 | 0 | 0.00 | 2 | 0.85 ApKaSx            |
| 44 | 0 | 0.00 | 1 | 0.42 ApClGmKaStSxSxt   |
| 45 | 0 | 0.00 | 1 | 0.42 ClSxTe            |
| 46 | 8 | 3.52 | 0 | 0.00 KaStSxTe          |
| 47 | 1 | 0.44 | 0 | 0.00 ApClStTe          |
| 48 | 1 | 0.44 | 0 | 0.00 KaSxTe            |
| 49 | 1 | 0.44 | 0 | 0.00 ApClGmKaStSxTeSxt |
| 50 | 1 | 0.44 | 0 | 0.00 ApClGmKaStSxTe    |
| 51 | 1 | 0.44 | 0 | 0.00 ApTe              |
| 52 | 1 | 0.44 | 0 | 0.00 ApSxTe            |
| 53 | 1 | 0.44 | 0 | 0.00 ApSx              |

---

Total

227

236
