# Supplementary material for: Detection of Rare Antimicrobial Resistance Profiles by Active and Passive Surveillance Approaches
Source: PubMed Central journal article supplement (PMC4938605; doi:10.1371/journal.pone.0158515), 2016-07-08
Supplement: pone.0158515.s002.pdf [file pone.0158515.s002.pdf]

| Profile | active/healthy | % active/healthy isolates | passive/clinical | % passive/clinical isolates | phenotype         |
|---------|----------------|---------------------------|------------------|-----------------------------|-------------------|
| 1       | 133            | 54.07                     | 54               | 64.29                       | Pansusceptible    |
| 2       | 55             | 22.36                     | 10               | 11.90                       | AmcApCnCf         |
| 3       | 1              | 0.41                      | 1                | 1.19                        | Te                |
| 5       | 1              | 0.41                      | 0                | 0.00                        | StTe              |
| 7       | 6              | 2.44                      | 0                | 0.00                        | GmStSx            |
| 9       | 8              | 3.25                      | 4                | 4.76                        | ApSt              |
| 10      | 0              | 0.00                      | 1                | 1.19                        | ApKaStTe          |
| 11      | 3              | 1.22                      | 1                | 1.19                        | KaStTe            |
| 12      | 31             | 12.60                     | 5                | 5.95                        | Ap                |
| 14      | 0              | 0.00                      | 1                | 1.19                        | AmcApCnCfClStSxTe |
| 15      | 2              | 0.81                      | 1                | 1.19                        | ApGmStSx          |
| 18      | 0              | 0.00                      | 1                | 1.19                        | SxSxt             |
| 20      | 1              | 0.41                      | 2                | 2.38                        | ApStSx            |
| 22      | 0              | 0.00                      | 1                | 1.19                        | AmcApCnCfStSx     |
| 23      | 0              | 0.00                      | 1                | 1.19                        | ApStTe            |
| 26      | 2              | 0.81                      | 0                | 0.00                        | GmSx              |
| 27      | 1              | 0.41                      | 0                | 0.00                        | ApGmStSxTe        |
| 28      | 1              | 0.41                      | 0                | 0.00                        | KaSxSxt           |
| 34      | 0              | 0.00                      | 1                | 1.19                        | AmcApCnCfSt       |
| 36      | 1              | 0.41                      | 0                | 0.00                        | ApNal             |

Total 246 84
